# Supplementary material for: Biobased Compostable Plastics End-of-Life: Environmental Assessment Including Carbon Footprint and Microplastic Impacts
Source: MDPI journal article supplement (doi:10.3390/polym16213073), 2024-10-31
Supplement: s1 [file s1]

## **Supporting Information**

# **Biobased Compostable Plastics End-of-Life: Environmental Assessment Including Carbon Footprint and Microplastic Impacts**

Anthony Keyes<sup>a\*</sup>, Christopher M. Saffron<sup>b</sup>, Shilpa Manjure<sup>a</sup>, Ramani Narayan<sup>b</sup>

<sup>a</sup> *Northern Technologies International Corporation, Natur-Tec, 4201 Woodland Road, Circle Pines, MN, 55014*

<sup>b</sup> *Michigan State University, 204 Farrall Hall, East Lansing, MI 48824*

## Contents

|                                                                                  |    |
|----------------------------------------------------------------------------------|----|
| Life Cycle Inventory Data Sheets.....                                            | 3  |
| Table S1. Life Cycle Inventory for NT Gloves - Inputs .....                      | 3  |
| Table S2. Life Cycle Inventory for NT Gloves – Measured Impact Categories .....  | 4  |
| Table S3. Life Cycle Inventory for LDPE Gloves - Inputs.....                     | 5  |
| Table S4. Life Cycle Inventory for LDPE Gloves – Measured Impact Categories..... | 6  |
| Data Quality Indicators .....                                                    | 7  |
| Table S5. Life Cycle Inventory Table for PLA and Copolyester.....                | 7  |
| Table S6. Life Cycle Inventory Table for LDPE.....                               | 8  |
| Sensitivity Analysis .....                                                       | 9  |
| Comparative Charts .....                                                         | 11 |
| Conversion Factors.....                                                          | 13 |
| Converting Emissions to Impact Category .....                                    | 13 |
| Normalization Calculation for US Citizen Per Capita .....                        | 13 |

## Life Cycle Inventory Data Sheets

Life cycle inventory data sheets document the amount of resin, water, electricity, travel and packaging used to generate 1,000,000 gloves. The stream numbers for Tables S1-S4 correlated to the system boundaries of the system (Figure 4-5 in paper).

Table S1. Life Cycle Inventory for NT Gloves - Inputs

| Stream #                      | Inputs       |               |                    |                 |                           |
|-------------------------------|--------------|---------------|--------------------|-----------------|---------------------------|
|                               | <i>Resin</i> | <i>Water</i>  | <i>Electricity</i> | <i>Distance</i> | <i>Material Packaging</i> |
|                               | <i>kgs</i>   | <i>liters</i> | <i>kWh</i>         | <i>km</i>       | <i>kgs</i>                |
| PLA Impact Categories         | 1.00         | -             | -                  | -               | -                         |
| Copolyester Impact Categories | 1.00         | -             | -                  | -               | -                         |
| Electricity (Tamil Nadu)      | -            | -             | 1.00E+00           | -               | -                         |
| Short Haul Truck              | 1000.00      | -             | -                  | 1.00E+00        | -                         |
| Ship                          | 1000.00      | -             | -                  | 1.00E+00        | -                         |
| Rail Freight Diesel           | 1000.00      | -             | -                  | 1.00E+00        | -                         |
| 1                             | 207.39       |               |                    |                 |                           |
| 2                             | 892.00       |               |                    |                 |                           |
| 3                             | 165.02       |               |                    |                 |                           |
| 4                             | 3122.00      |               |                    |                 |                           |
| 5                             | 57.98        |               |                    |                 |                           |
| 6                             | 15.61        |               |                    |                 |                           |
| 7                             | 446.00       |               |                    |                 |                           |
| 8                             |              | 223           | 2.28E+02           |                 |                           |
| 9                             |              |               |                    |                 |                           |
| 10                            | 446.00       |               |                    |                 |                           |
| 11                            |              | 1.50E-01      |                    |                 |                           |
| 12                            |              | 1.50E-01      |                    |                 |                           |
| 13                            | 446.00       |               |                    |                 |                           |
| 14                            |              |               | 1.42E+00           |                 |                           |
| 15                            |              |               |                    |                 |                           |
| 16                            | 446.00       |               |                    |                 |                           |
| 17                            |              |               |                    |                 | 6.07E+00                  |
| 18                            | 4460.00      |               |                    |                 |                           |
| 19                            |              | 1.06E+03      | 1.28E+03           |                 |                           |
| 20                            |              |               |                    |                 |                           |
| 21                            | 4460.00      |               |                    |                 |                           |
| 22                            |              |               | 2.14E+02           |                 |                           |
| 23                            |              |               |                    |                 |                           |
| 24                            | 4460.00      |               |                    |                 |                           |
| 25                            |              |               | 3.64E+02           |                 |                           |
| 26                            |              |               |                    |                 |                           |
| 27                            | 4460.00      |               |                    |                 |                           |
| 28                            |              |               |                    |                 | 3.17E+02                  |
| 29                            | 207.39       |               |                    | 4.98E+03        |                           |
| 30                            | 165.02       |               |                    | 1.50E+04        |                           |
| 31                            | 892.00       |               |                    | 4.98E+03        |                           |
| 32                            | 3122.00      |               |                    | 4.98E+03        |                           |
| 33                            | 446.00       |               |                    | 0.00E+00        |                           |
| 34                            | 4460.00      |               |                    |                 |                           |
| Total                         | 4460.00      | 1.28E+03      | 2.09E+03           | 2.99E+04        | 3.23E+02                  |

Stream # correlates to the system boundaries (located in the appendix). Stream categories highlighted in blue show the six different inputs which are being measured to determine the output for measured impact categories. The functional unit for this table is 1,000,000 gloves which resulted in a total mass output of 4460 kgs.

Table S2. Life Cycle Inventory for NT Gloves – Measured Impact Categories

| Stream #                      | Measured Impact Categories |             |           |             |               |          |          |               |
|-------------------------------|----------------------------|-------------|-----------|-------------|---------------|----------|----------|---------------|
|                               | GWP                        | ME          | TE        | AP          | PM            | NREU     | REU      | ODP           |
|                               | kg CO <sub>2</sub> eq.     | kg of N eq. | mol N eq. | mol H + eq. | kg PM 2.5 eq. | GJ       | GJ       | kg CFC-11 eq. |
| PLA Impact Categories         | 5.01E-01                   | 1.33E-02    | 3.38E-02  | 1.82E-02    | 1.74E-03      | 2.88E-02 | 6.04E-02 | 0.00E+00      |
| Copolyester Impact Categories | 3.70E+00                   | 1.40E-03    | 1.51E-02  | 5.17E-03    | 2.79E-04      | 1.18E-03 | 7.57E-05 | 6.66E-11      |
| Electricity (Tamil Nadu)      | 3.98E-01                   | 8.68E-05    | 5.70E-04  | 4.90E-05    | 9.33E-06      | 1.80E-03 | 1.80E-03 | 0.00E+00      |
| Short Haul Truck              | 9.45E-02                   | 4.27E-06    | 2.81E-05  | 1.22E-06    | 5.18E-05      | 1.39E-03 | 0.00E+00 | 0.00E+00      |
| Ship                          | 1.09E-04                   | 0.00E+00    | 1.42E-06  | 7.61E-08    | 2.53E-07      |          |          | 0.00E+00      |
| Rail Freight Diesel           | 1.77E-02                   | 0.00E+00    | 3.66E-05  | 1.33E-06    | 1.45E-06      |          |          | 0.00E+00      |
| 1                             | 1.04E+02                   | 2.76E+00    | 7.01E+00  | 3.77E+00    | 3.61E-01      | 5.97E+00 | 1.25E+01 | 0.00E+00      |
| 2                             | 4.47E+02                   | 1.19E+01    | 3.01E+01  | 1.62E+01    | 1.55E+00      | 2.57E+01 | 5.39E+01 | 0.00E+00      |
| 3                             | 6.11E+02                   | 2.31E-01    | 2.49E+00  | 8.53E-01    | 4.60E-02      | 1.95E-01 | 1.25E-02 | 1.10E-08      |
| 4                             | 1.16E+04                   | 4.37E+00    | 4.71E+01  | 1.61E+01    | 8.71E-01      | 3.68E+00 | 2.36E-01 | 2.08E-07      |
| 5                             |                            |             |           |             |               |          |          |               |
| 6                             |                            |             |           |             |               |          |          |               |
| 7                             |                            |             |           |             |               |          |          |               |
| 8                             |                            |             |           |             |               |          |          |               |
| 9                             | 9.10E+01                   | 1.98E-02    | 1.30E-01  | 1.12E-02    | 2.13E-03      | 4.11E-01 | 4.11E-01 | 0.00E+00      |
| 10                            |                            |             |           |             |               |          |          |               |
| 11                            |                            |             |           |             |               |          |          |               |
| 12                            |                            |             |           |             |               |          |          |               |
| 13                            |                            |             |           |             |               |          |          |               |
| 14                            |                            |             |           |             |               |          |          |               |
| 15                            | 5.67E-01                   | 1.24E-04    | 8.12E-04  | 6.97E-05    | 1.33E-05      | 2.56E-03 | 2.56E-03 | 0.00E+00      |
| 16                            |                            |             |           |             |               |          |          |               |
| 17                            |                            |             |           |             |               |          |          |               |
| 18                            |                            |             |           |             |               |          |          |               |
| 19                            |                            |             |           |             |               |          |          |               |
| 20                            | 5.12E+02                   | 1.11E-01    | 7.33E-01  | 6.29E-02    | 1.20E-02      | 2.31E+00 | 2.31E+00 | 0.00E+00      |
| 21                            |                            |             |           |             |               |          |          |               |
| 22                            |                            |             |           |             |               |          |          |               |
| 23                            | 8.53E+01                   | 1.86E-02    | 1.22E-01  | 1.05E-02    | 2.00E-03      | 3.85E-01 | 3.85E-01 | 0.00E+00      |
| 24                            |                            |             |           |             |               |          |          |               |
| 25                            |                            |             |           |             |               |          |          |               |
| 26                            | 1.45E+02                   | 3.16E-02    | 2.08E-01  | 1.78E-02    | 3.40E-03      | 6.55E-01 | 6.55E-01 | 0.00E+00      |
| 27                            |                            |             |           |             |               |          |          |               |
| 28                            |                            |             |           |             |               |          |          |               |
| 29                            | 2.47E-01                   | 1.12E-05    | 7.34E-05  | 3.20E-06    | 1.35E-04      | 3.64E-03 | 0.00E+00 | 0.00E+00      |
| 30                            | 6.84E+00                   | 2.95E-04    | 5.46E-03  | 2.72E-04    | 4.19E-03      | 9.61E-02 | 0.00E+00 | 0.00E+00      |
| 31                            | 1.06E+00                   | 4.80E-05    | 3.16E-04  | 1.37E-05    | 5.82E-04      | 1.57E-02 | 0.00E+00 | 0.00E+00      |
| 32                            | 1.29E+02                   | 5.57E-03    | 1.03E-01  | 5.14E-03    | 7.92E-02      | 1.82E+00 | 0.00E+00 | 0.00E+00      |
| 33                            |                            |             |           |             |               |          |          |               |
| 34                            |                            |             |           |             |               |          |          |               |
| Total                         | 1.37E+04                   | 1.94E+01    | 8.81E+01  | 3.71E+01    | 2.93E+00      | 4.12E+01 | 7.04E+01 | 2.19E-07      |

Stream # correlates to the system boundaries (located in the appendix). Stream categories highlighted in blue show the six different streams whose measured impact categories are populated per unit measurement. These stream categories are used to populate the stream table by multiplying the inputs by their according stream category. The functional unit for this table is 1,000,000 gloves which resulted in a total mass output of 4460 kgs.

Table S3. Life Cycle Inventory for LDPE Gloves - Inputs

| Stream #                 | Inputs       |               |                    |                 |                           |
|--------------------------|--------------|---------------|--------------------|-----------------|---------------------------|
|                          | <i>Resin</i> | <i>Water</i>  | <i>Electricity</i> | <i>Distance</i> | <i>Material Packaging</i> |
|                          | <i>kgs</i>   | <i>liters</i> | <i>kWh</i>         | <i>km</i>       | <i>kgs</i>                |
| LDPE Impact Categories   | 1.00         | -             | -                  | -               | -                         |
| Electricity (Tamil Nadu) | -            | -             | 1.00E+00           | -               | -                         |
| Long Haul Truck          | 1000.00      | -             | -                  | 1.00E+00        | -                         |
| 1                        | 135.55       |               |                    |                 |                           |
| 2                        | 3480.39      |               |                    |                 |                           |
| 3                        | 47.63        |               |                    |                 |                           |
| 4                        | 183.18       |               |                    |                 |                           |
| 5                        |              | 91.58929      | 9.38E+01           |                 |                           |
| 6                        |              |               |                    |                 |                           |
| 7                        | 183.18       |               |                    |                 |                           |
| 8                        |              | 1.50E-01      |                    |                 |                           |
| 9                        |              | 1.50E-01      |                    |                 |                           |
| 10                       | 183.18       |               |                    |                 |                           |
| 11                       |              |               | 5.85E-01           |                 |                           |
| 12                       |              |               |                    |                 |                           |
| 13                       | 183.18       |               |                    |                 |                           |
| 14                       |              |               |                    |                 | 2.49E+00                  |
| 15                       | 3663.57      |               |                    |                 |                           |
| 16                       |              | 8.72E+02      | 1.06E+03           |                 |                           |
| 17                       |              |               |                    |                 |                           |
| 18                       | 3663.57      |               |                    |                 |                           |
| 19                       |              |               | 1.76E+02           |                 |                           |
| 20                       |              |               |                    |                 |                           |
| 21                       | 3663.57      |               |                    |                 |                           |
| 22                       |              |               | 2.99E+02           |                 |                           |
| 23                       |              |               |                    |                 |                           |
| 24                       | 3663.57      |               |                    |                 |                           |
| 25                       |              |               |                    |                 | 2.60E+02                  |
| 26                       | 135.55       |               |                    | 6.71E+02        |                           |
| 27                       | 3663.57      |               |                    | 6.71E+02        |                           |
| 28                       | 183.18       |               |                    | 0.00E+00        |                           |
| 29                       | 3663.57      |               |                    |                 |                           |
| Total                    | 3663.57      | 9.64E+02      | 1.62E+03           | 1.34E+03        | 2.63E+02                  |

Stream # correlates to the system boundaries (located in the appendix). Stream categories highlighted in blue show the six different inputs which are being measured to determine the output for measured impact categories. The functional unit for this table is 1,000,000 gloves which resulted in a total mass output of 3664 kgs.

Table S4. Life Cycle Inventory for LDPE Gloves – Measured Impact Categories

| Stream #                 | Measured Impact Categories |             |           |             |               |          |          |               |
|--------------------------|----------------------------|-------------|-----------|-------------|---------------|----------|----------|---------------|
|                          | GWP                        | ME          | TE        | AP          | PM            | NREU     | REU      | ODP           |
| Stream #                 | kg CO <sub>2</sub> eq.     | kg of N eq. | mol N eq. | mol H + eq. | kg PM 2.5 eq. | GJ       | GJ       | kg CFC-11 eq. |
| LDPE Impact Categories   | 1.93E+00                   | 3.00E-04    | 6.10E-04  | 6.50E-03    | 9.97E-04      | 7.98E-02 | 5.00E-04 | 1.30E-06      |
| Electricity (Tamil Nadu) | 3.98E-01                   | 8.68E-05    | 5.70E-04  | 4.90E-05    | 9.33E-06      | 1.80E-03 | 1.80E-03 | 0.00E+00      |
| Long Haul Truck          | 6.15E-02                   | 5.29E-06    | 3.48E-05  | 1.30E-06    | 8.75E-07      | 1.39E-03 | 0.00E+00 | 0.00E+00      |
| 1                        | 2.61E+02                   | 4.07E-02    | 8.26E-02  | 8.81E-01    | 1.35E-01      | 1.08E+01 | 6.78E-02 | 1.76E-04      |
| 2                        | 6.71E+03                   | 1.04E+00    | 2.12E+00  | 2.26E+01    | 3.47E+00      | 2.78E+02 | 1.74E+00 | 4.52E-03      |
| 3                        |                            |             |           |             |               |          |          |               |
| 4                        |                            |             |           |             |               |          |          |               |
| 5                        |                            |             |           |             |               |          |          |               |
| 6                        | 3.74E+01                   | 8.14E-03    | 5.35E-02  | 4.59E-03    | 8.75E-04      | 1.69E-01 | 1.69E-01 | 0.00E+00      |
| 7                        |                            |             |           |             |               |          |          |               |
| 8                        |                            |             |           |             |               |          |          |               |
| 9                        |                            |             |           |             |               |          |          |               |
| 10                       |                            |             |           |             |               |          |          |               |
| 11                       |                            |             |           |             |               |          |          |               |
| 12                       | 2.33E-01                   | 5.07E-05    | 3.34E-04  | 2.86E-05    | 5.46E-06      | 1.05E-03 | 1.05E-03 | 0.00E+00      |
| 13                       |                            |             |           |             |               |          |          |               |
| 14                       |                            |             |           |             |               |          |          |               |
| 15                       |                            |             |           |             |               |          |          |               |
| 16                       |                            |             |           |             |               |          |          |               |
| 17                       | 4.20E+02                   | 9.15E-02    | 6.02E-01  | 5.17E-02    | 9.84E-03      | 1.90E+00 | 1.90E+00 | 0.00E+00      |
| 18                       |                            |             |           |             |               |          |          |               |
| 19                       |                            |             |           |             |               |          |          |               |
| 20                       | 7.01E+01                   | 1.53E-02    | 1.00E-01  | 8.61E-03    | 1.64E-03      | 3.17E-01 | 3.17E-01 | 0.00E+00      |
| 21                       |                            |             |           |             |               |          |          |               |
| 22                       |                            |             |           |             |               |          |          |               |
| 23                       | 1.19E+02                   | 2.59E-02    | 1.71E-01  | 1.46E-02    | 2.79E-03      | 5.38E-01 | 5.38E-01 | 0.00E+00      |
| 24                       |                            |             |           |             |               |          |          |               |
| 25                       |                            |             |           |             |               |          |          |               |
| 26                       | 5.59E+00                   | 4.81E-04    | 3.16E-03  | 1.18E-04    | 7.96E-05      | 1.27E-01 | 0.00E+00 | 0.00E+00      |
| 27                       | 1.51E+02                   | 0.00E+00    | 1.92E-02  | 0.00E+00    | 6.17E-08      | 0.00E+00 | 0.00E+00 | 0.00E+00      |
| 28                       |                            |             |           |             |               |          |          |               |
| 29                       |                            |             |           |             |               |          |          |               |
| Total                    | 7.77E+03                   | 1.23E+00    | 3.15E+00  | 2.36E+01    | 3.62E+00      | 2.92E+02 | 4.73E+00 | 4.70E-03      |

Stream # correlates to the system boundaries (located in the appendix). Stream categories highlighted in blue show the six different streams whose measured impact categories are populated per unit measurement. These stream categories are used to populate the stream table by multiplying the inputs by their according stream category. The functional unit for this table is 1,000,000 gloves which resulted in a total mass output of 3364 kgs.

## Data Quality Indicators

Data quality indicators were benchmarked utilizing the Weidima method.

Table S5. Life Cycle Inventory Table for PLA and Copolyester

| Variable Inputs              | Unit of Measure            | Value    | Data Source                          | DQI |   |   |   |   |
|------------------------------|----------------------------|----------|--------------------------------------|-----|---|---|---|---|
|                              |                            |          |                                      | A   | B | C | D | E |
| Resins                       |                            |          |                                      |     |   |   |   |   |
| PLA Resin                    | % Mass                     | 25.00    | doi.org/10.1007/s10924-019-01525-9   | 1   | 1 | 1 | 1 | 1 |
| Copolyester Resin            | % Mass                     | 75.00    | Supplier (Confidential)              | 2   | 1 | 2 | 3 | 5 |
| Reactive Extrusion Process   |                            |          |                                      |     |   |   |   |   |
| Water for Cooling Extruder   | L / kg material            | 0.50     | Directly Measured                    | 1   | 1 | 1 | 1 | 1 |
| Water for Water Bath         | L / run                    | 0.15     | Directly Measured                    | 1   | 1 | 1 | 1 | 1 |
| Electricity for Extruder     | kWh / kg material          | 0.51     | Directly Measured                    | 1   | 1 | 1 | 1 | 1 |
| Electricity for Pelletizer   | kWh / kg material          | 0.00     | Directly Measured                    | 1   | 1 | 1 | 1 | 1 |
| Vaccum Electricity Demand    | kWh / kg material          | 0.04     | Directly Measured                    | 1   | 1 | 1 | 1 | 1 |
| Oven Electricity Demand      | kWh / kg material          | 0.03     | Directly Measured                    | 1   | 1 | 1 | 1 | 1 |
| Packaging of Granulate       | kg packaging / kg material | 0.01     | Directly Measured                    | 1   | 1 | 1 | 1 | 1 |
| Blown Film Extrusion Process |                            |          |                                      |     |   |   |   |   |
| Water for Cooling Extruder   | L / kg material            | 0.24     | Directly Measured                    | 1   | 1 | 1 | 1 | 1 |
| Electricity for Extruder     | kWh / kg material          | 0.29     | Directly Measured                    | 1   | 1 | 1 | 1 | 1 |
| Electricity for Air Flow     | kWh / kg material          | 0.05     | Directly Measured                    | 1   | 1 | 1 | 1 | 1 |
| Rolling Electricity Demand   | kWh / kg material          | 0.08     | Directly Measured                    | 1   | 1 | 1 | 1 | 1 |
| Oven Electricity Demand      | kWh / kg material          | 0.05     | Directly Measured                    | 1   | 1 | 1 | 1 | 1 |
| Packaging of Granulate       | kg packaging / kg material | 0.07     | Directly Measured                    | 1   | 1 | 1 | 1 | 1 |
| Transportation               |                            |          |                                      |     |   |   |   |   |
| PLA Transport                |                            |          |                                      |     |   |   |   |   |
| 1) Supplier to Port          | km                         | 12.60    | GREET 2021 (Short Haul Truck)        | 2   | 1 | 2 | 3 | 3 |
| 2) Port to Port              | km                         | 4950.40  | doi.org/10.1007/978-3-319-30127-3_65 | 2   | 2 | 1 | 2 | 1 |
| 3) Port to India             | km                         | 19,8     | GREET 2021 (Short Haul Truck)        | 2   | 1 | 2 | 3 | 3 |
| Copolyester Transport        |                            |          |                                      |     |   |   |   |   |
| 1) Supplier to Port          | km                         | 418.00   | GREET 2021 (Rail Freight Diesel)     | 2   | 1 | 2 | 3 | 3 |
| 2) Port to Port              | km                         | 14553.00 | doi.org/10.1007/978-3-319-30127-3_65 | 2   | 2 | 1 | 2 | 1 |
| 3) Port to India             | km                         | 19.80    | GREET 2021 (Short Haul Truck)        | 2   | 1 | 2 | 3 | 3 |

Table S6. Life Cycle Inventory Table for LDPE

| Variable Inputs                     | Unit of Measure            | Value  | Data Source                                | DQI |   |   |   |   |
|-------------------------------------|----------------------------|--------|--------------------------------------------|-----|---|---|---|---|
|                                     |                            |        |                                            | A   | B | C | D | E |
| Resins                              |                            |        |                                            |     |   |   |   |   |
| LDPE Resin                          | % Mass                     | 100.00 | cradle-to-gate-life-cycle-analysis-of-LDPE | 2   | 1 | 1 | 1 | 1 |
| Reactive Extrusion Process          |                            |        |                                            |     |   |   |   |   |
| Water for Cooling Extruder          | L / kg material            | 0.50   | Directly Measured                          | 1   | 1 | 1 | 1 | 1 |
| Water for Water Bath                | L / run                    | 0.15   | Directly Measured                          | 1   | 1 | 1 | 1 | 1 |
| Electricity for Extruder            | kWh / kg material          | 0.51   | Directly Measured                          | 1   | 1 | 1 | 1 | 1 |
| Electricity for Pelletizer          | kWh / kg material          | 0.00   | Directly Measured                          | 1   | 1 | 1 | 1 | 1 |
| Vaccum Electricity Demand           | kWh / kg material          | 0.04   | Directly Measured                          | 1   | 1 | 1 | 1 | 1 |
| Oven Electricity Demand             | kWh / kg material          | 0.03   | Directly Measured                          | 1   | 1 | 1 | 1 | 1 |
| Packaging of Granulate              | kg packaging / kg material | 0.01   | Directly Measured                          | 1   | 1 | 1 | 1 | 1 |
| Blown Film Extrusion Process        |                            |        |                                            |     |   |   |   |   |
| Water for Cooling Extruder          | L / kg material            | 0.24   | Directly Measured                          | 1   | 1 | 1 | 1 | 1 |
| Electricity for Extruder            | kWh / kg material          | 0.29   | Directly Measured                          | 1   | 1 | 1 | 1 | 1 |
| Electricity for Air Flow            | kWh / kg material          | 0.05   | Directly Measured                          | 1   | 1 | 1 | 1 | 1 |
| Rolling Electricity Demand          | kWh / kg material          | 0.08   | Directly Measured                          | 1   | 1 | 1 | 1 | 1 |
| Oven Electricity Demand             | kWh / kg material          | 0.05   | Directly Measured                          | 1   | 1 | 1 | 1 | 1 |
| Packaging of Granulate              | kg packaging / kg material | 0.07   | Directly Measured                          | 1   | 1 | 1 | 1 | 1 |
| Transportation                      |                            |        |                                            |     |   |   |   |   |
| LDPE Transport Supplier to NT India | km                         | 671.00 | GREET 2021 (Long Haul Truck)               | 2   | 1 | 2 | 3 | 3 |



## Sensitivity Analysis

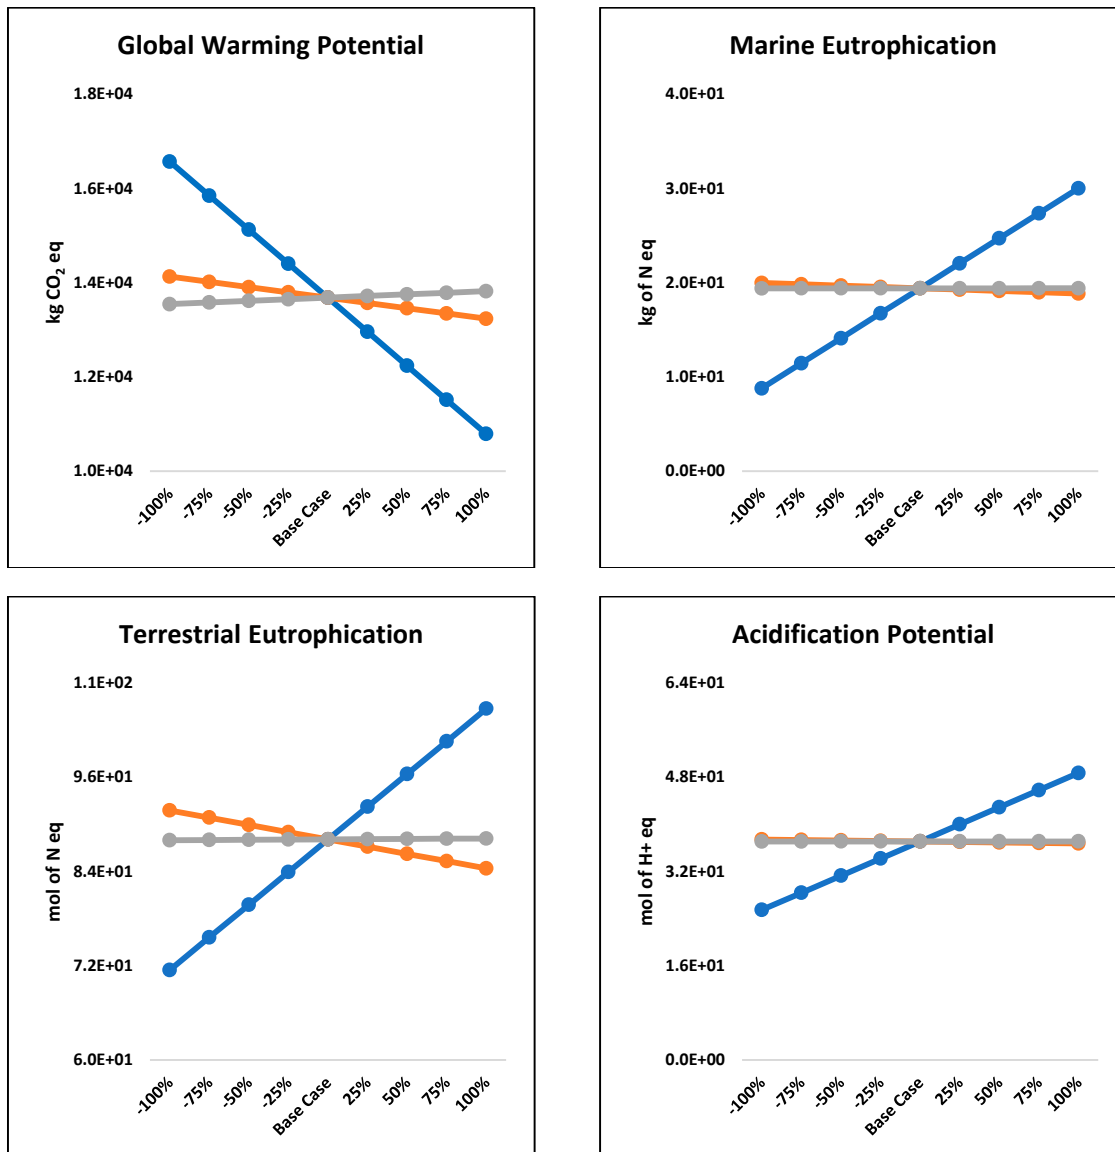

**Figure S1.** Sensitivity analysis for the measured impact categories (GWP, ME, TE and AP). The **blue** line measures the change in the ratio of PLA:Copolyester used in the formulation. The **orange** line refers to the energy input ratio for REU:NREU used in the system. Lastly, the **grey** line refers to the distance required for the total transportation of materials.

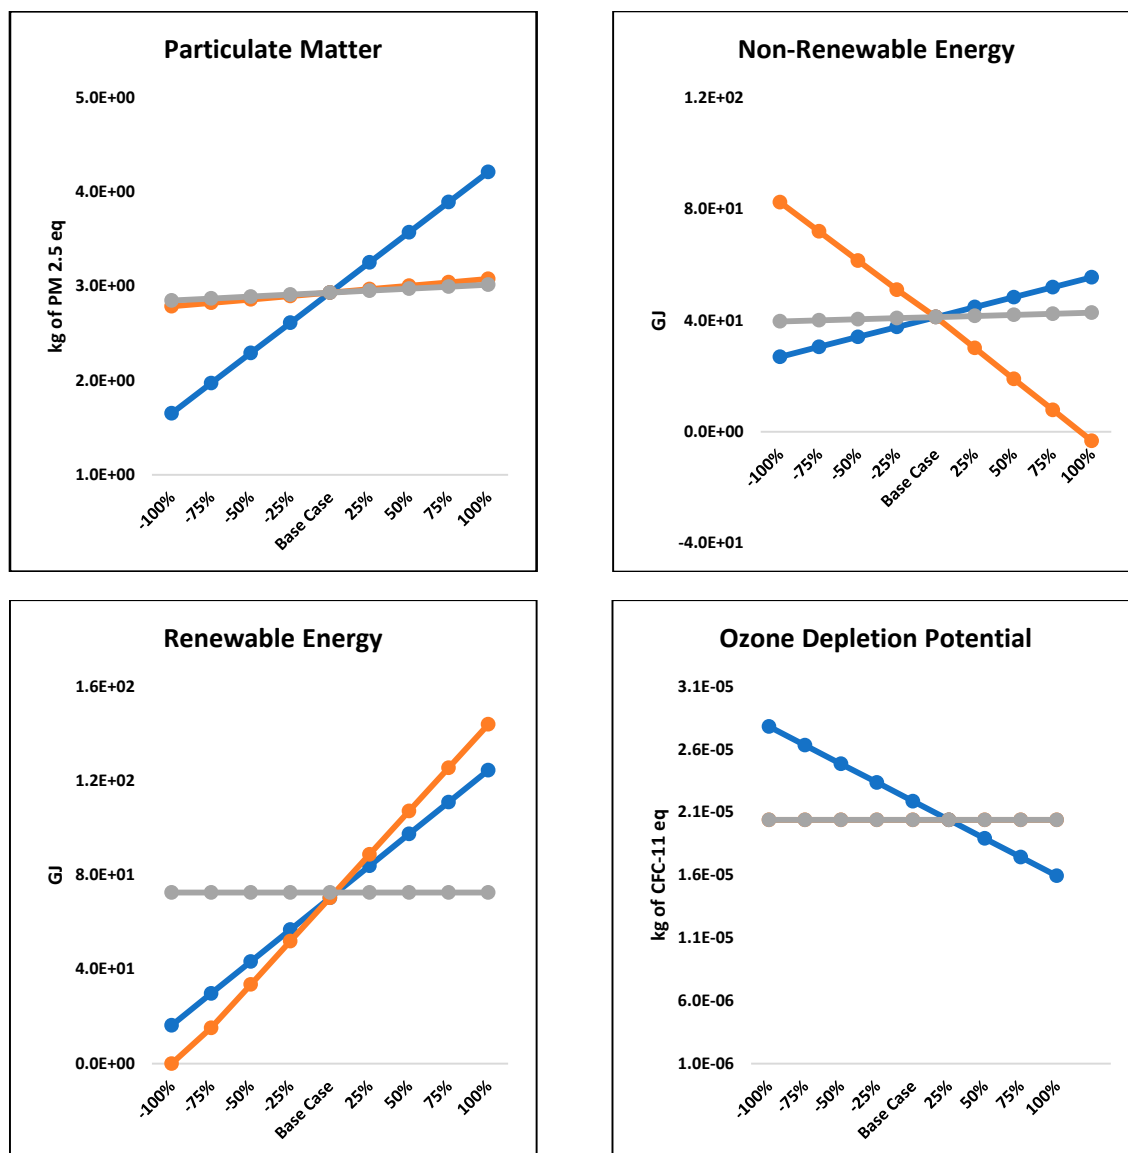

**Figure S2.** Sensitivity analysis for the measured impact categories (PM, NREU, REU and ODP). The **blue** line measures the change in the ratio of PLA:Copolyester used in the formulation. The **orange** line refers to the energy input ratio for REU:NREU used in the system. Lastly, the **grey** line refers to the distance required for the total transportation of materials.

## Comparative Charts

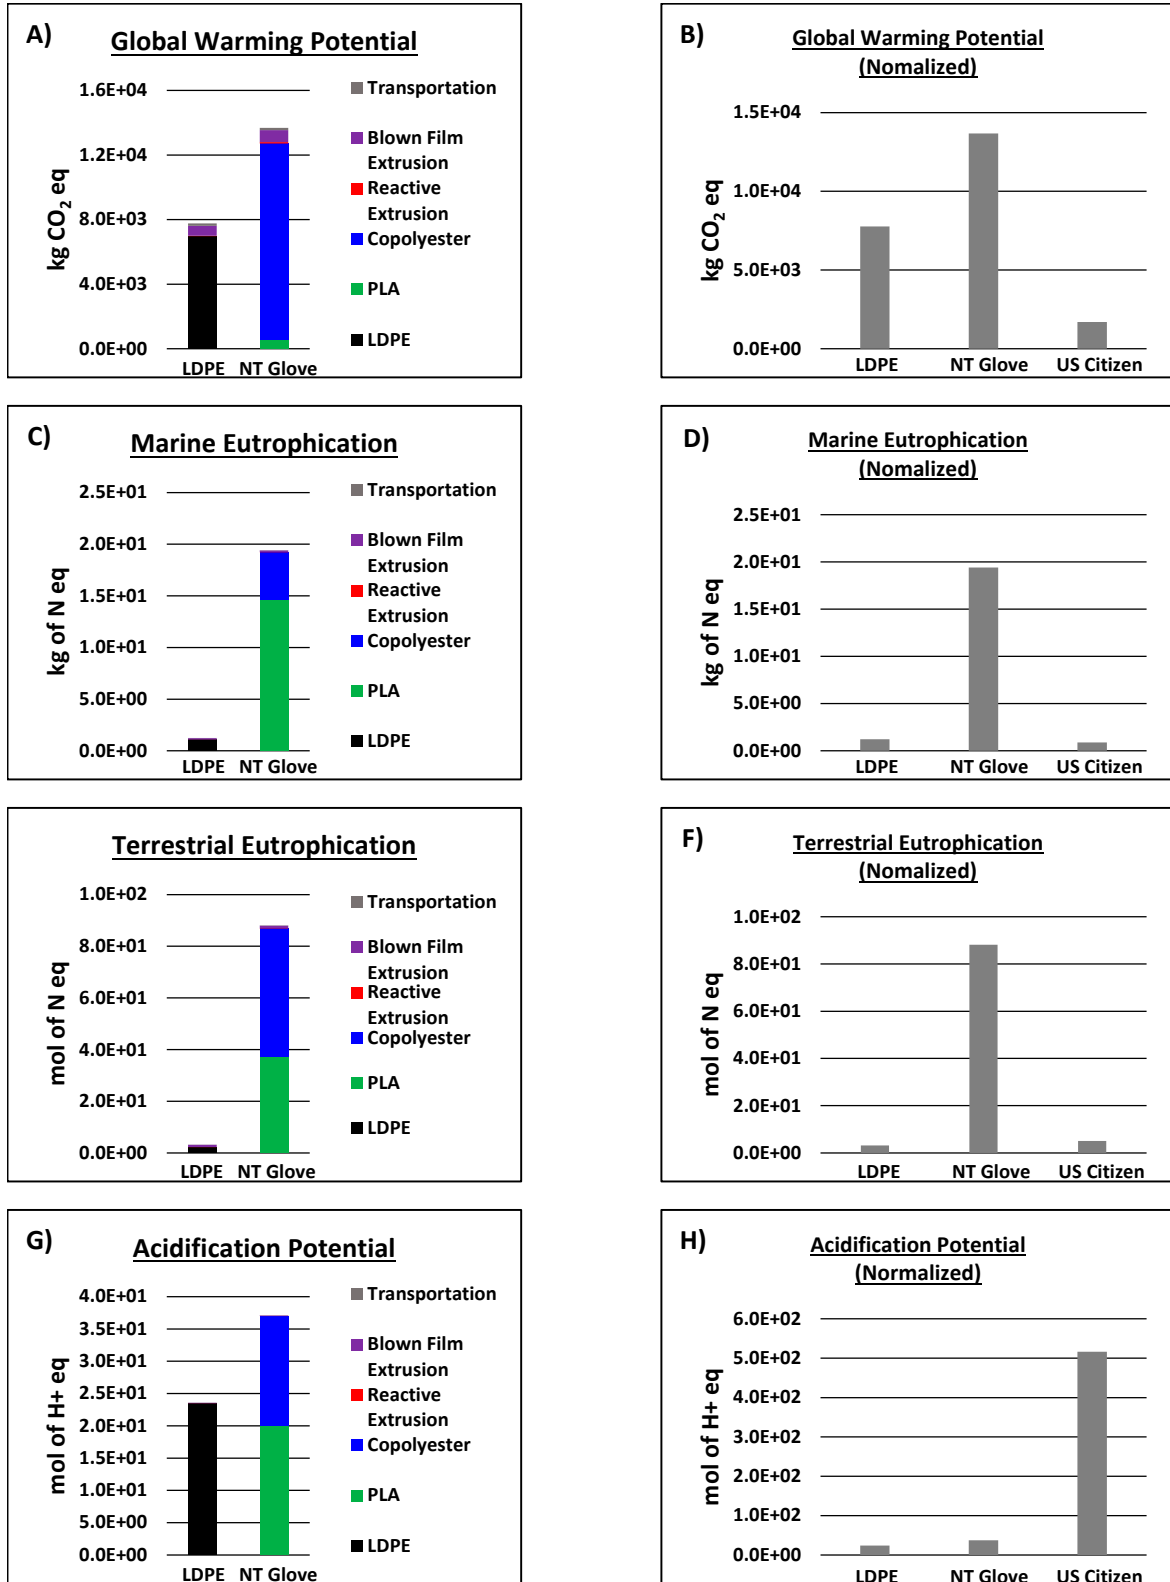

**Figure S3:** Stacked bar charts showing the environmental impacts (GWP, ME, TE, and AP) for LDPE and NT gloves. Normalized bar charts are displayed on the right on the stacked bar chart categories.

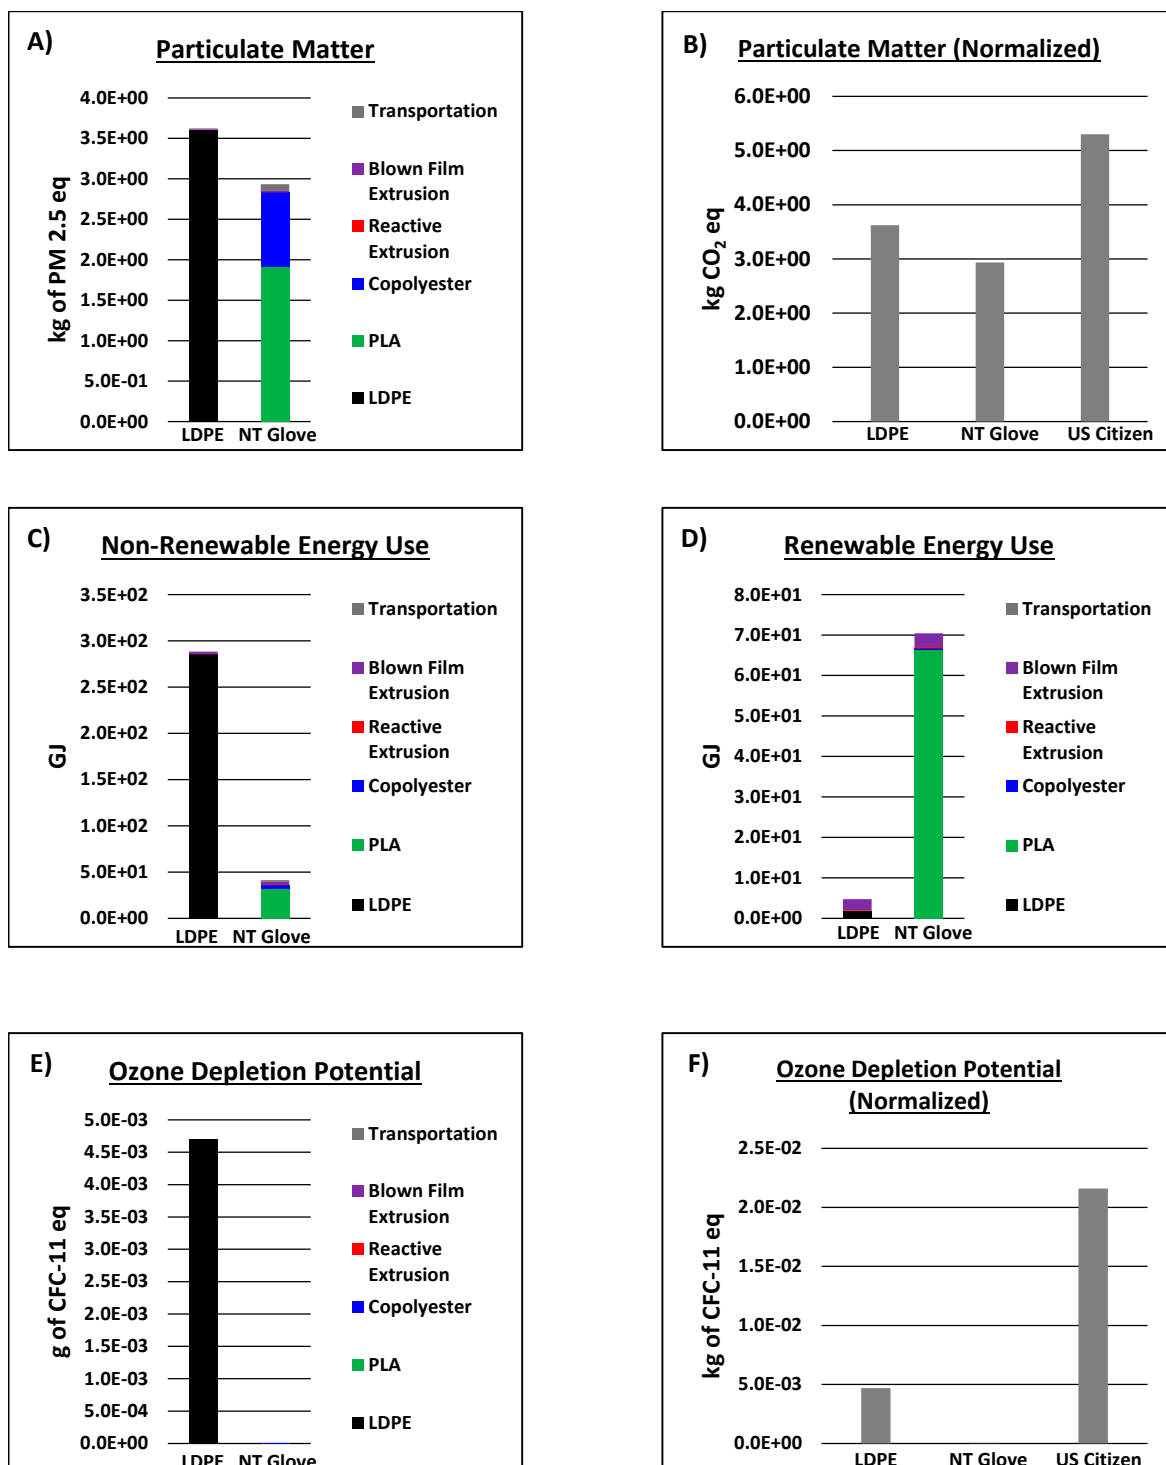

**Figure S4:** Stacked bar charts showing the environmental impacts (PM, NREU, REU and ODP) for LDPE and NT gloves. Normalized bar charts are shown for PM and ODP on the right of the stack bar charts.

## Conversion Factors

### Converting Emissions to Impact Category

TRACI data were used to convert measured emissions into equivalent values for impact categories (Bare, 2008). The following calculations were used.

- GWP Characterization Factors
  - 1 kg of CH<sub>4</sub> = 25 kg of CO<sub>2</sub> equivalents
  - 1 kg of N<sub>2</sub>O = 298 kg of CO<sub>2</sub> equivalents
- ME Characterization Factors
  - 1 kg of NO<sub>x</sub> = 0.0686 kg of N equivalents
- TE Characterization Factors
  - 1 kg of NO<sub>x</sub> = 0.451 mol of N equivalents
- AP Characterization Factors
  - 1 kg of NO<sub>x</sub> = 0.016195925 mol of H<sup>+</sup> equivalents
  - 1 kg of SO<sub>x</sub> = 0.015609 mol of H<sup>+</sup> equivalents

Example Calculation: 10 kg of CH<sub>4</sub> = (10\*25) kg CO<sub>2</sub> equivalents = 250 kg CO<sub>2</sub> equivalents

### Normalization Calculation for US Citizen Per Capita

- Functional Unit = 1,000,000 gloves
- Annual glove production = 14,400,000 gloves / year
- Conversion factor = 0.069444 years

Example Calculation: Comparing 10 kg CO<sub>2</sub> equivalents of material to (1000 kg CO<sub>2</sub> equivalents by US citizen / year)

- (1000 kg CO<sub>2</sub> equivalents by US citizen / year) \* (0.069444 years)
  - = 69.44 kg CO<sub>2</sub> equivalents by US citizen
- Normalized Factor = 10 kg CO<sub>2</sub> equivalents of material / 69.44 kg CO<sub>2</sub> equivalents by US citizen
  - = 0.144 normalized factor of material to a US citizen
